# Supplementary material for: Effects of Epoxyeicosatrienoic Acid-Enhancing Therapy on the Course of Congestive Heart Failure in Angiotensin II-Dependent Rat Hypertension: From mRNA Analysis towards Functional In Vivo Evaluation
Source: MDPI journal article supplement (doi:10.3390/biomedicines9081053), 2021-08-20
Supplement: s1 [file s1]

## Figure Legends

### **Supplementary Figure 1.** Kidney mRNA expression of the renin-angiotensin system.

Kidney angiotensinogen (A), renin (B), angiotensin-converting enzyme (ACE) (C), ACE type 2 (ACE2) (D), angiotensin type 1 subtype A (AT<sub>1A</sub>) receptor (E), angiotensin type 2 (AT<sub>2</sub>) receptor (F) and Mas receptor (G) gene expression in sham-operated transgene-negative Hannover Sprague-Dawley (HanSD), sham-operated heterozygous Ren-2 transgenic rats (TGR) and TGR rats with aorto-caval fistula (ACF) two weeks after creation of ACF or sham-operation. \* P<0.05 versus sham-operated HanSD rats.

### **Supplementary Figure 2.** Kidney mRNA expression of the cytochrome-P450 enzymes and adrenergic receptors.

Kidney CYP2C23 (A), CYP4A1 (B), soluble epoxide hydrolase (sEH) (C),  $\alpha$ 1 subtype a ( $\alpha$ 1a) adrenergic receptor (D),  $\alpha$ 1 subtype b ( $\alpha$ 1b) adrenergic receptor (E) and  $\beta$  type 1 ( $\beta$ 1) adrenergic receptor (F) in sham-operated transgene-negative Hannover Sprague-Dawley (HanSD), sham-operated heterozygous Ren-2 transgenic rats (TGR) and TGR rats with aorto-caval fistula (ACF) two weeks after creation of ACF or sham-operation.

### **Supplementary Figure 3.** Biochemical parameters before initiation of treatment.

Plasma and kidney angiotensin II (ANG II) (A and E), plasma and kidney angiotensin-1-7 (ANG 1-7) levels (B and F), plasma and kidney ANG 1-7/ANG II ratios (C and G) and plasma and kidney norepinephrine levels (D and H) in sham-operated transgene-negative Hannover Sprague-Dawley (HanSD), sham-operated heterozygous Ren-2 transgenic rats (TGR) and TGR rats with aorto-caval fistula (ACF) two weeks after creation of ACF or sham-operation. \* P<0.05 versus sham-operated HanSD rats.

**Supplementary Figure 4.** Assessment of protein expression (Western blot analyses) of the enzymes responsible for cytochrome P450 (CYP)-dependent production of eicosanoids before initiation of treatment.

Kidney and left ventricle CYP4A1 protein expression (A and E), kidney and left ventricle 20-hydroxyeicosatetraenoic acids (20-HETE) concentrations (B and F), kidney and left ventricle CYP2C23 protein expression (C and G) and kidney and left ventricle soluble epoxide hydrolase (sEH) protein expression (D and H) in sham-operated transgene-negative Hannover Sprague-Dawley (HanSD) rats, sham-operated heterozygous Ren-2 transgenic rats (TGR) and TGR rats with aorto-caval fistula (ACF) two weeks after creation of ACF or sham-operation. \*  $P < 0.05$  versus sham-operated HanSD rats.

**Supplementary Figure 5.** Assessment of kidney tissue availability of metabolites of cytochrome P450 (CYP)-dependent epoxygenase pathway of arachidonic acid metabolism.

Kidney 5,6-epoxyeicosatrienoic acids (EETs) (A), kidney 8,9-EETs (B), kidney 11,12-EETs (C), kidney 14,15-EETs (D), kidney dihydroxyeicosatrienoic acids (DHETs) (E) in sham-operated transgene-negative Hannover Sprague-Dawley rats (HanSD), sham-operated heterozygous Ren-2 transgenic rats (TGR) and TGR rats with aorto-caval fistula (ACF) two weeks after creation of ACF or sham-operation. \*  $P < 0.05$  versus sham-operated HanSD rats and sham-operated TGR.

**Supplementary Figure 6.** Assessment of left ventricle tissue availability of metabolites of cytochrome P450 (CYP)-dependent epoxygenase pathway of arachidonic acid metabolism.

Left Ventricle 5,6-epoxyeicosatrienoic acids (EETs) (A), left ventricle 8,9-EETs (B), left ventricle 11,12-EETs (C), left ventricle 14,15-EETs (D), left ventricle dihydroxyeicosatrienoic acids (DHETs) (E) in sham-operated transgene-negative Hannover Sprague-Dawley (HanSD), sham-operated heterozygous Ren-2 transgenic rats (TGR) and TGR rats with aorto-caval fistula (ACF) two weeks after creation of ACF or sham-operation. \*  $P < 0.05$  versus sham-operated HanSD rats and sham-operated TGR.
