# Supplementary material for: Effects of Epoxyeicosatrienoic Acid-Enhancing Therapy on the Course of Congestive Heart Failure in Angiotensin II-Dependent Rat Hypertension: From mRNA Analysis towards Functional In Vivo Evaluation
Source: Biomedicines. 2021 Aug 20;9(8):1053. doi: 10.3390/biomedicines9081053 (PMC8393645; doi:10.3390/biomedicines9081053)
Supplement: Supplementary file 1 [file biomedicines-09-01053-s001.zip]

Archive with 7 entries (7 files):
- Figure legends for supplementary figures.pdf
- Supplementary Figure 1.jpg
- Supplementary Figure 2.jpg
- Supplementary Figure 3.jpg
- Supplementary Figure 4.jpg
- Supplementary Figure 5.jpg
- Supplementary Figure 6.jpg
